# Supplementary material
Source: publisher figshare collection journal article supplement (https://gsajournals.figshare.com/ndownloader/files/22364187)
Supplement: Supplementary file 1 [file 22364187]

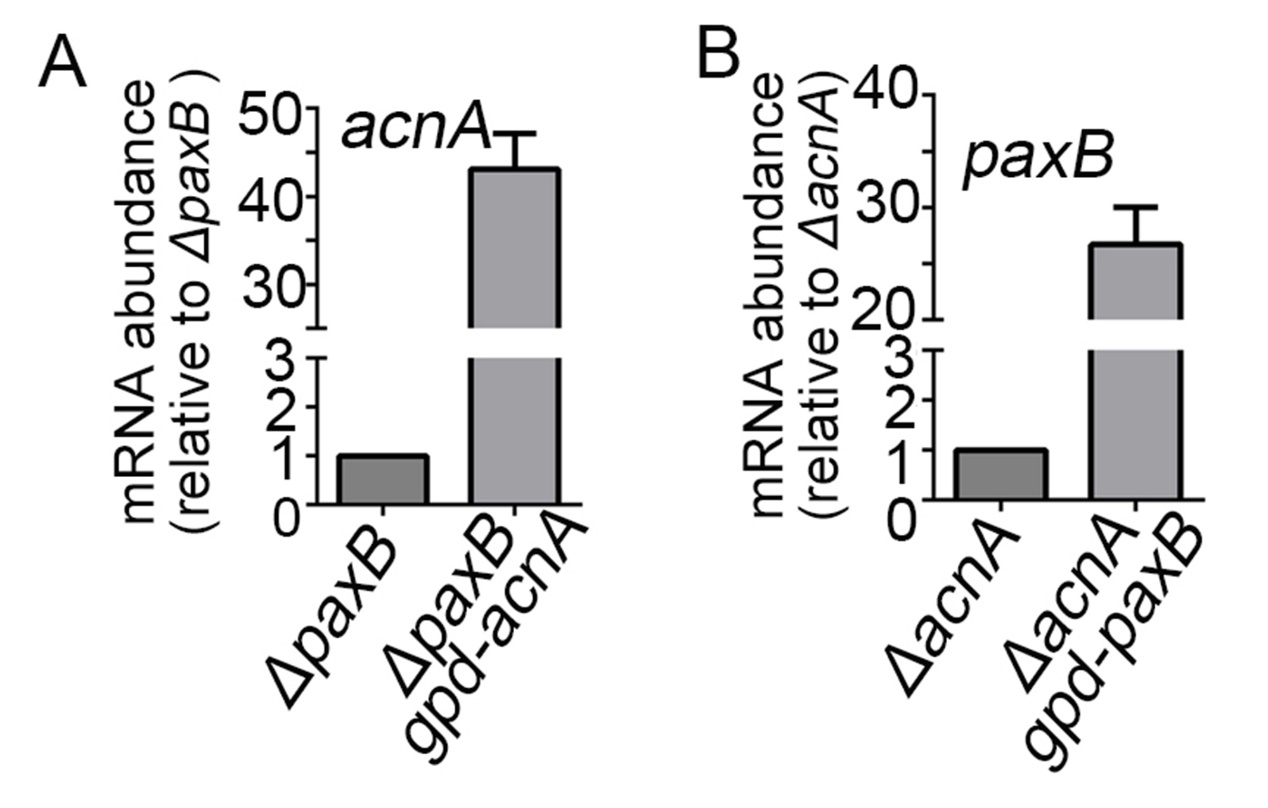


**Figure S5. Verification of the construction of overexpressed strains.** The detection of the mRNA expression levels of (A) *acnA* and (B) *paxB* in the related strains via real-time PCR.
